# Supplementary material for: Prediction of long-term memory scores in MCI based on resting-state fMRI
Source: PubMed Central journal article supplement — Neuroimage Clin. 2016 Oct 11;12:785–95. doi: 10.1016/j.nicl.2016.10.004 (PMC5079359; doi:10.1016/j.nicl.2016.10.004), 2016-10-11
Supplement: mmc1.pdf [file mmc1.pdf]

# SUPPLEMENTARY MATERIAL: PREDICTION OF LONG-TERM MEMORY SCORES IN MCI BASED ON RESTING-STATE FMRI

D.-E. MESKALDJI ET AL.

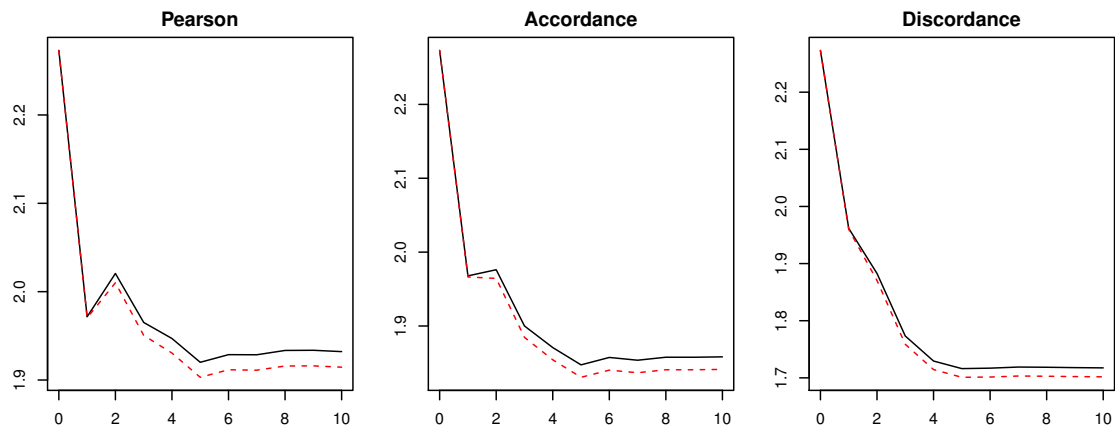

FIGURE 1. RMSEP plots for each PLSR model corresponding to Pearson correlation, accordance and discordance measures, respectively. Two cross-validation estimates are shown: CV is the ordinary cross validation estimate (continuous line), and adjCV is a bias-corrected cross-validation estimate (dashed line). According to these plots, the optimal number of components is 5 for all measures.

|             | LOO    |       | CV-5-rand         |                   | CV-5-indep        |                   |
|-------------|--------|-------|-------------------|-------------------|-------------------|-------------------|
|             | $\rho$ | $R^2$ | $\rho$            | $R^2$             | $\rho$            | $R^2$             |
| Pearson     | 0.527  | 0.260 | $0.498 \pm 0.053$ | $0.223 \pm 0.069$ | $0.501 \pm 0.052$ | $0.228 \pm 0.067$ |
| Accordance  | 0.561  | 0.315 | $0.523 \pm 0.049$ | $0.270 \pm 0.055$ | $0.523 \pm 0.052$ | $0.270 \pm 0.059$ |
| Discordance | 0.641  | 0.409 | $0.593 \pm 0.047$ | $0.349 \pm 0.053$ | $0.598 \pm 0.045$ | $0.355 \pm 0.051$ |

TABLE 1. Predictive performance of PLS regression models. The CV-5-rand and CV-5-indep performances are obtained by averaging 1000 iterations.

|    | First region             | Second region      | p-value | t-value |
|----|--------------------------|--------------------|---------|---------|
| 1  | Parietal_Sup_L           | Precentral_R       | 0.0008  | 3.5695  |
| 2  | Rectus_R                 | Frontal_Inf_Orb_L  | 0.0011  | 3.4606  |
| 3  | Fusiform_L               | Calcarine_L        | 0.0015  | -3.3378 |
| 4  | Caudate_R                | Amygdala_L         | 0.0023  | -3.1974 |
| 5  | Frontal_Mid_Orb_Medial_R | Frontal_Inf_Oper_L | 0.0026  | 3.1580  |
| 6  | Occipital_Inf_R          | Cingulum_Mid_L     | 0.0028  | -3.1351 |
| 7  | Occipital_Sup_R          | Frontal_Inf_Tri_R  | 0.0033  | 3.0797  |
| 8  | Caudate_L                | Parietal_Sup_R     | 0.0034  | -3.0686 |
| 9  | Occipital_Mid_R          | Occipital_Sup_R    | 0.0038  | 3.0285  |
| 10 | Caudate_L                | Fusiform_R         | 0.0043  | -2.9840 |
| 11 | ParaHippocampal_L        | Frontal_Mid_Orb_L  | 0.0045  | 2.9614  |
| 12 | Olfactory_L              | Frontal_Inf_Oper_R | 0.0048  | 2.9426  |
| 13 | Lingual_R                | Frontal_Mid_Orb_R  | 0.0048  | 2.9422  |
| 14 | Insula_R                 | Frontal_Mid_Orb_L  | 0.0049  | 2.9357  |

TABLE 2. Most important connections in the Pearson correlation based model with their corresponding p-values and t-statistics. We show only p-values lower than 0.005. The connections are ordered by p-value significance. The sign of the t-statistics indicates wether more connectivity (Pearson correlation) contributes positively or negatively to the episodic memory performance.

|    | First region        | Second region      | p-value | t.test  |
|----|---------------------|--------------------|---------|---------|
| 1  | Occipital_Sup_R     | Frontal_Inf_Tri_R  | 0.0004  | 3.7834  |
| 2  | Caudate_R           | Amygdala_L         | 0.0006  | -3.6675 |
| 3  | SupraMarginal_L     | Amygdala_R         | 0.0009  | -3.5063 |
| 4  | Olfactory_L         | Frontal_Inf_Oper_R | 0.0011  | 3.4411  |
| 5  | Insula_R            | Frontal_Mid_Orb_L  | 0.0013  | 3.3963  |
| 6  | Temporal_Pole_Mid_R | Cuneus_L           | 0.0015  | -3.3465 |
| 7  | Temporal_Sup_R      | Frontal_Mid_R      | 0.0019  | -3.2658 |
| 8  | Fusiform_L          | Calcarine_L        | 0.0020  | -3.2568 |
| 9  | Rectus_L            | Frontal_Inf_Tri_L  | 0.0021  | 3.2342  |
| 10 | Caudate_R           | Frontal_Inf_Orb_L  | 0.0024  | 3.1804  |
| 11 | Cingulum_Post_R     | Frontal_Inf_Orb_L  | 0.0025  | 3.1699  |
| 12 | Parietal_Sup_R      | Occipital_Inf_R    | 0.0025  | 3.1670  |
| 13 | Caudate_L           | Parietal_Sup_R     | 0.0026  | -3.1528 |
| 14 | Calcarine_L         | Amygdala_R         | 0.0026  | -3.1517 |
| 15 | Rectus_R            | Rolandic_Oper_L    | 0.0029  | 3.1164  |
| 16 | Cingulum_Mid_R      | Insula_L           | 0.0030  | -3.1028 |
| 17 | Cingulum_Mid_L      | Frontal_Inf_Tri_L  | 0.0031  | 3.0913  |
| 18 | Heschl_L            | Frontal_Inf_Tri_R  | 0.0033  | -3.0737 |
| 19 | ParaHippocampal_L   | Frontal_Mid_Orb_L  | 0.0035  | 3.0509  |
| 20 | Fusiform_R          | Frontal_Inf_Oper_R | 0.0039  | 3.0118  |
| 21 | Fusiform_R          | Amygdala_R         | 0.0041  | -2.9983 |
| 22 | Putamen_R           | Angular_L          | 0.0043  | -2.9803 |
| 23 | Temporal_Pole_Mid_L | Rectus_R           | 0.0045  | -2.9655 |
| 24 | Occipital_Mid_R     | Cingulum_Mid_L     | 0.0045  | -2.9615 |
| 25 | Rectus_R            | Frontal_Inf_Orb_L  | 0.0047  | 2.9492  |
| 26 | Heschl_L            | Putamen_L          | 0.0048  | -2.9383 |

TABLE 3. Most important connections in the accordance based model with their corresponding p-values and t-statistics. We show only p-values lower than 0.005. The connections are ordered by p-value significance. The sign of the t-statistics indicates whether more accordance contributes positively or negatively to the episodic memory performance.

|    | First region         | Second region      | p-value | t-value |
|----|----------------------|--------------------|---------|---------|
| 1  | Amygdala_R           | Supp_Motor_Area_L  | 0.0001  | -4.1564 |
| 2  | Paracentral_Lobule_L | Cingulum_Ant_L     | 0.0001  | 4.1217  |
| 3  | Thalamus_L           | Insula_R           | 0.0003  | 3.8323  |
| 4  | Angular_L            | Occipital_Sup_R    | 0.0007  | 3.6194  |
| 5  | Paracentral_Lobule_L | Cingulum_Mid_R     | 0.0009  | 3.5214  |
| 6  | Thalamus_R           | Cuneus_L           | 0.0009  | 3.5114  |
| 7  | Paracentral_Lobule_L | Frontal_Inf_Orb_L  | 0.0010  | 3.4917  |
| 8  | Amygdala_R           | Supp_Motor_Area_R  | 0.0011  | -3.4374 |
| 9  | Thalamus_L           | Insula_L           | 0.0012  | 3.4263  |
| 10 | Angular_L            | Occipital_Sup_L    | 0.0013  | 3.3959  |
| 11 | Temporal_Inf_L       | Postcentral_L      | 0.0017  | 3.3101  |
| 12 | Postcentral_L        | Frontal_Mid_Orb_L  | 0.0018  | 3.2871  |
| 13 | Thalamus_L           | Cuneus_R           | 0.0019  | 3.2720  |
| 14 | Amygdala_R           | Frontal_Sup_L      | 0.0019  | -3.2655 |
| 15 | Temporal_Pole_Sup_R  | Thalamus_L         | 0.0021  | 3.2266  |
| 16 | Hippocampus_L        | Cingulum_Ant_R     | 0.0022  | -3.2226 |
| 17 | Thalamus_L           | Occipital_Sup_R    | 0.0022  | 3.2160  |
| 18 | Occipital_Sup_L      | Frontal_Inf_Oper_R | 0.0025  | -3.1722 |
| 19 | Cuneus_R             | Precentral_R       | 0.0025  | -3.1659 |
| 20 | Thalamus_L           | Occipital_Sup_L    | 0.0027  | 3.1509  |
| 21 | Temporal_Mid_R       | Insula_L           | 0.0027  | 3.1452  |
| 22 | Hippocampus_L        | Cingulum_Ant_L     | 0.0028  | -3.1263 |
| 23 | Amygdala_R           | Frontal_Mid_Orb_R  | 0.0029  | -3.1220 |
| 24 | Rectus_L             | Olfactory_R        | 0.0032  | -3.0899 |
| 25 | Paracentral_Lobule_R | Frontal_Inf_Orb_L  | 0.0032  | 3.0871  |
| 26 | Parietal_Inf_L       | Rolandic_Oper_R    | 0.0035  | -3.0554 |
| 27 | Hippocampus_R        | Supp_Motor_Area_L  | 0.0036  | -3.0473 |
| 28 | Amygdala_R           | Frontal_Mid_R      | 0.0036  | -3.0460 |
| 29 | Paracentral_Lobule_L | Insula_L           | 0.0036  | 3.0403  |
| 30 | Hippocampus_R        | Cingulum_Ant_L     | 0.0043  | -2.9781 |

TABLE 4. Most important connections in the discordance based model with their corresponding p-values and t-statistics. We show only p-values lower than 0.005. The connections are ordered by p-value significance. The sign of the t-statistics indicates whether more discordance contributes positively or negatively to the episodic memory performance.

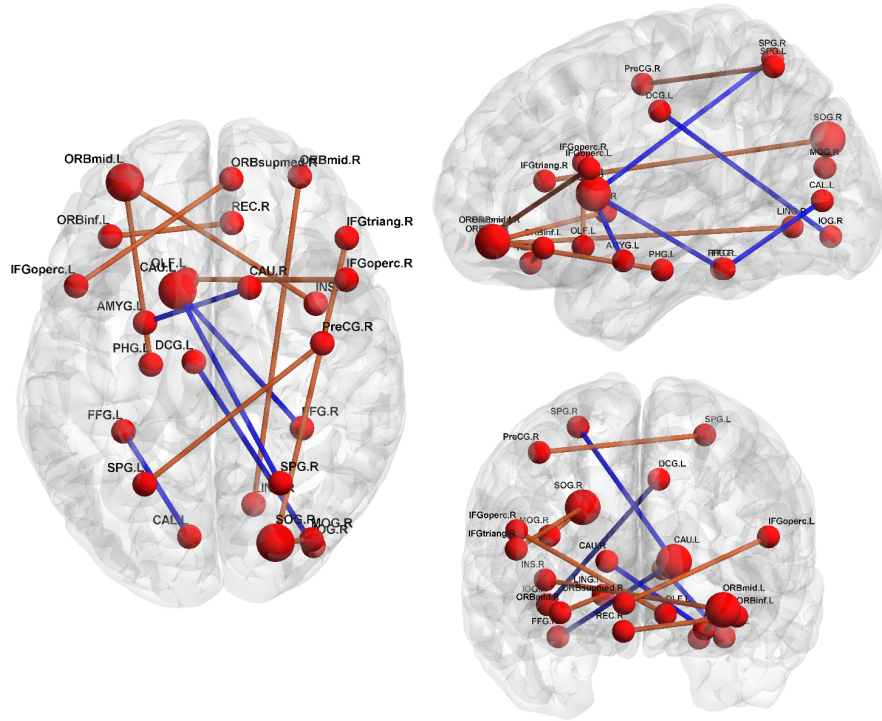

(A) Pearson

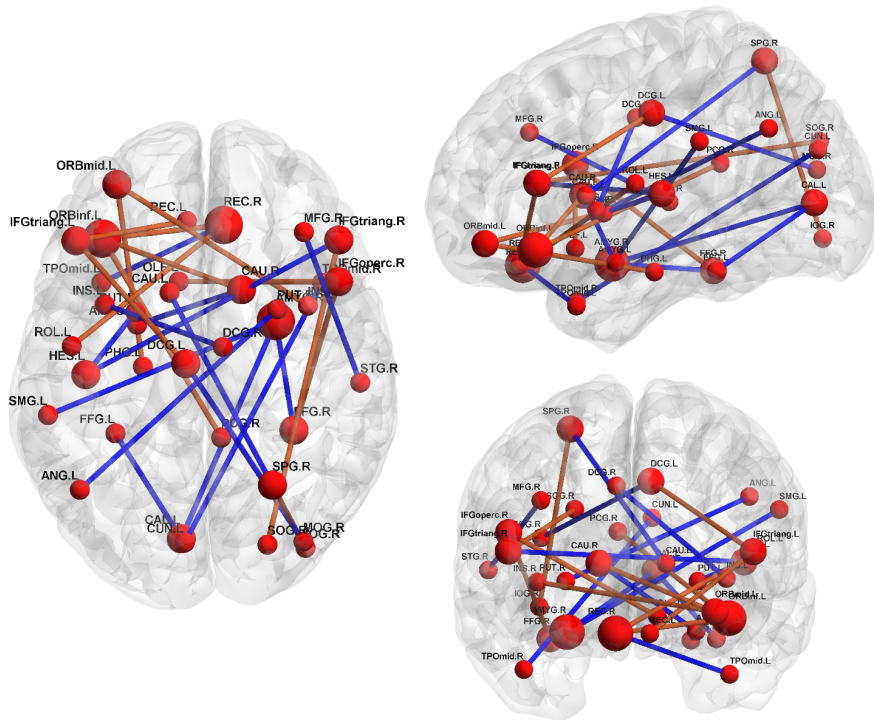

(B) Accordance

FIGURE 2. Significant connections obtained by thresholding p-values (at level 0.005) corresponding to the coefficients of Pearson (A) and accordance (B) based PLSR models. The connection color represents the sign of the coefficient corresponding to each connection in the PLSR model (orange for positive coefficients and blue for negative coefficients). The node size is proportional to the node degree in the brain maps after the thresholding.
